# Supplementary material for: Renin-angiotensin system blocker and outcomes of COVID-19: a systematic review and meta-analysis
Source: HighWire-hosted journal article supplement (doi:10.1136/thoraxjnl-2020-215322), 2021-01-27
Supplement: thoraxjnl-2020-215322supp002_data_supplement.pdf [file thoraxjnl-2020-215322supp002_data_supplement.pdf]

## Supplementary Appendix 2. List of excluded references after full-text review

| Number | Title                                                                                                                                                                                                             | First author              | Journal (Year)               | Main reason for exclusion                                                                                                                                               |
|--------|-------------------------------------------------------------------------------------------------------------------------------------------------------------------------------------------------------------------|---------------------------|------------------------------|-------------------------------------------------------------------------------------------------------------------------------------------------------------------------|
| 1      | Clinical Characteristics and Risk Factors for Fatal Outcome in Patients with 2019-Coronavirus Infected Disease (COVID-19) in Wuhan                                                                                | Chen M. et al.            | SSRN (2020)                  | data source is likely to be same with the included study of Zhang et al.                                                                                                |
| 2      | ACE inhibitors, AT1 receptor blockers and COVID-19: clinical epidemiology evidences for a continuation of treatments. The ACER-COVID study                                                                        | Dauchet L. et al.         | medRxiv (2020)               | The use of ACE inhibitor or ARB was not evaluated according to disease severity or mortality.                                                                           |
| 3      | ACE inhibitors, ARBs and other anti-hypertensive drugs and novel COVID-19: An association study from the COVID Symptom tracker app in 2,215,386 individuals                                                       | Dooley HC. et al.         | SSRN (2020)                  | Disease severity or mortality data was not available.                                                                                                                   |
| 4      | Cardiovascular Implications of Fatal Outcomes of Patients With Coronavirus Disease 2019 (COVID-19)                                                                                                                | Guo T. et al.             | JAMA Cardiol. (2020)         | data source is likely to be same with the included study of Zhang et al.                                                                                                |
| 5      | The Role of Angiotensin Converting Enzyme 2 in Coronaviruses/Influenza Viruses and Cardiovascular Disease                                                                                                         | Li C. et al.              | SSRN (2020)                  | No specific data on COVID-19 was available                                                                                                                              |
| 6      | Anti-hypertensive Angiotensin II receptor blockers associated to mitigation of disease severity in elderly COVID-19 patients                                                                                      | Liu Y. et al.             | medRxiv (2020)               | The data source is likely to be same with the included study of Meng et al.                                                                                             |
| 7      | The Effect of Psychological Support for the Relatives of Intensive Care Unit Patients on Cadaveric Organ Donation Rate                                                                                            | Liu Y. et al.             | Sci China Life Sci. (2020)   | Disease severity or mortality data was not available.                                                                                                                   |
| 8      | Clinical and biochemical indexes from 2019-nCoV infected patients linked to viral loads and lung injury                                                                                                           | Liu Y. et al.             | Sci China Life Sci. (2020)   | Disease severity or mortality data was not available.                                                                                                                   |
| 9      | Clinical presentation and initial management critically ill patients with severe acute respiratory syndrome coronavirus 2 (SARS-CoV-2) infection in Brescia, Italy                                                | Piva S. et al.            | J Crit Care (2020)           | The use of ACE inhibitor or ARB was not evaluated according to disease severity or mortality.                                                                           |
| 10     | Outcomes in Patients with COVID-19 Infection Taking ACEI/ARB                                                                                                                                                      | Rico-Mesa JS. et al.      | Curr Cardiol Rep. (2020)     | The use of ACE inhibitor or ARB was not evaluated according to disease severity or mortality.                                                                           |
| 11     | Clinical characteristics associated with COVID-19 severity in California                                                                                                                                          | Samuel R. et al.          | medRxiv (2020)               | The use of ACE inhibitor or ARB was not evaluated according to disease severity or mortality.                                                                           |
| 12     | Comorbidities in COVID-19: Outcomes in hypertensive cohort and controversies with renin angiotensin system blockers                                                                                               | Singh AK. et al.          | Diabetes Metab Syndr. (2020) | This is a pooled analysis using results from other studies.                                                                                                             |
| 13     | Chronic Use of Angiotensin-Converting Enzyme Inhibitors and Angiotensin II Receptor Blockers Is High Among Intensive Care Unit Patients With Non-COVID-19 Sepsis but Carries a Moderately Increased Risk of Death | Sunden-Cullberg J. et al. | Hypertension (2020)          | The patients diagnosed with COVID-19 were not evaluated.                                                                                                                |
| 14     | Hypertension and Diabetes Delay the Viral Clearance in COVID-19 Patients                                                                                                                                          | Xiaoping C. et al.        | medRxiv (2020)               | Although researchers found that angiotensin-converting enzyme 2 was related with delayed viral clearance, the data on effect of ACE inhibitor or ARB was not available. |
| 15     | The Role of Angiotensin Converting Enzyme 2 in the Gastrointestinal Infection Risk and Potential Fecal Oral-Transmission Route of 2019-nCoV                                                                       | Xing yong C. et al.       | SSRN (2020)                  | The use of ACE inhibitor or ARB was not evaluated according to disease severity or                                                                                      |

---

mortality.

---
