# Supplementary material for: Renin-angiotensin system blocker and outcomes of COVID-19: a systematic review and meta-analysis
Source: HighWire-hosted journal article supplement (doi:10.1136/thoraxjnl-2020-215322), 2021-01-27

**A. Mortality**

Funnel plot with pseudo 95% confidence limits

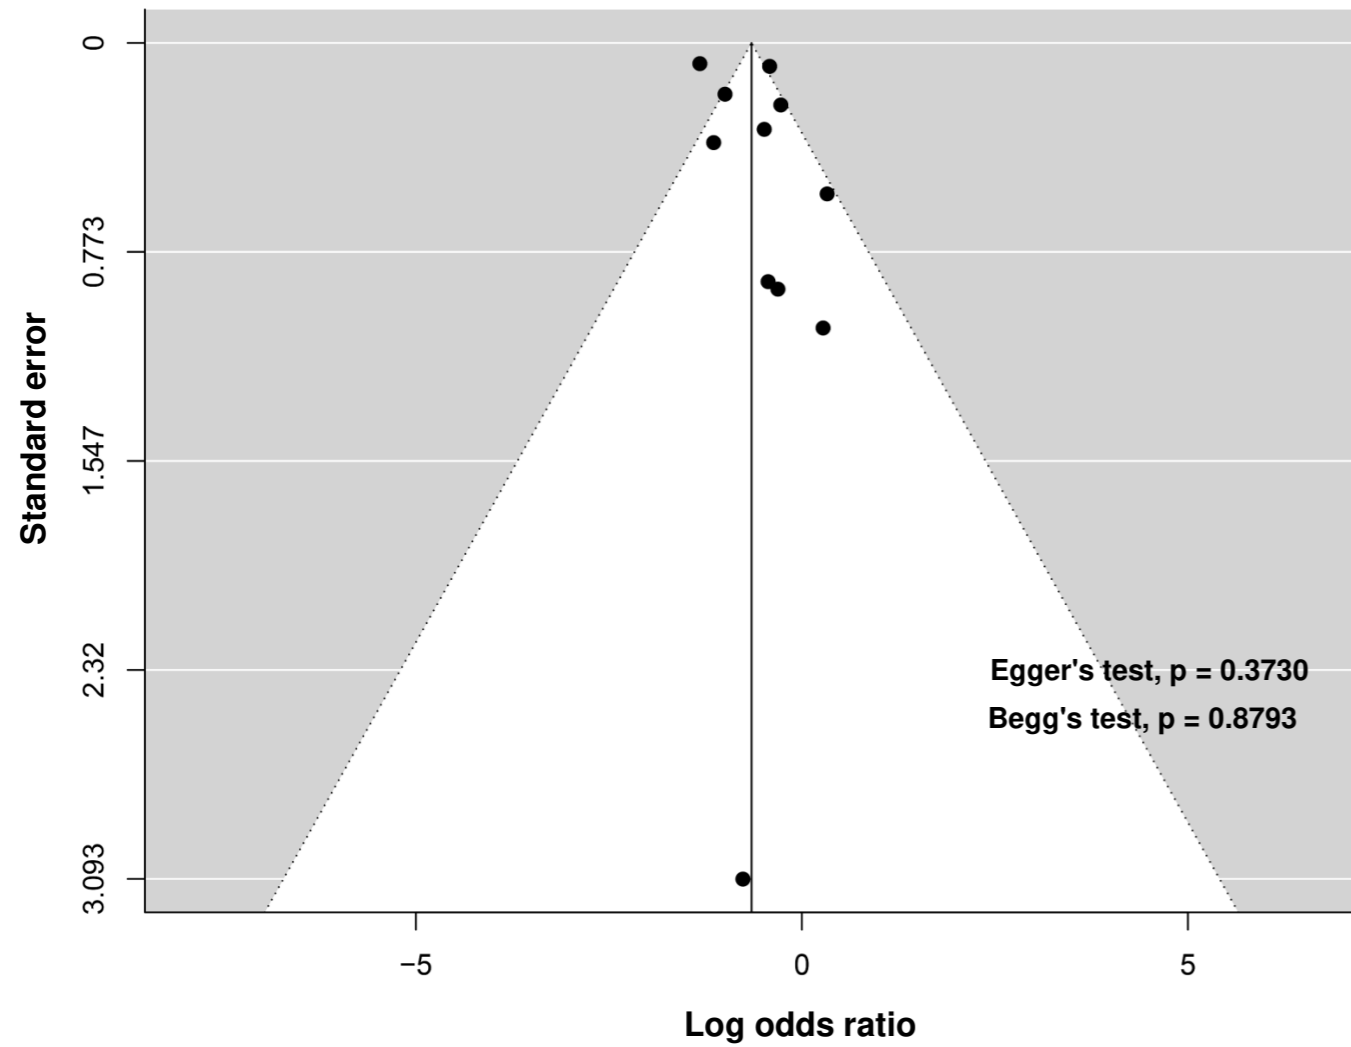**B. Severe disease**

Funnel plot with pseudo 95% confidence limits

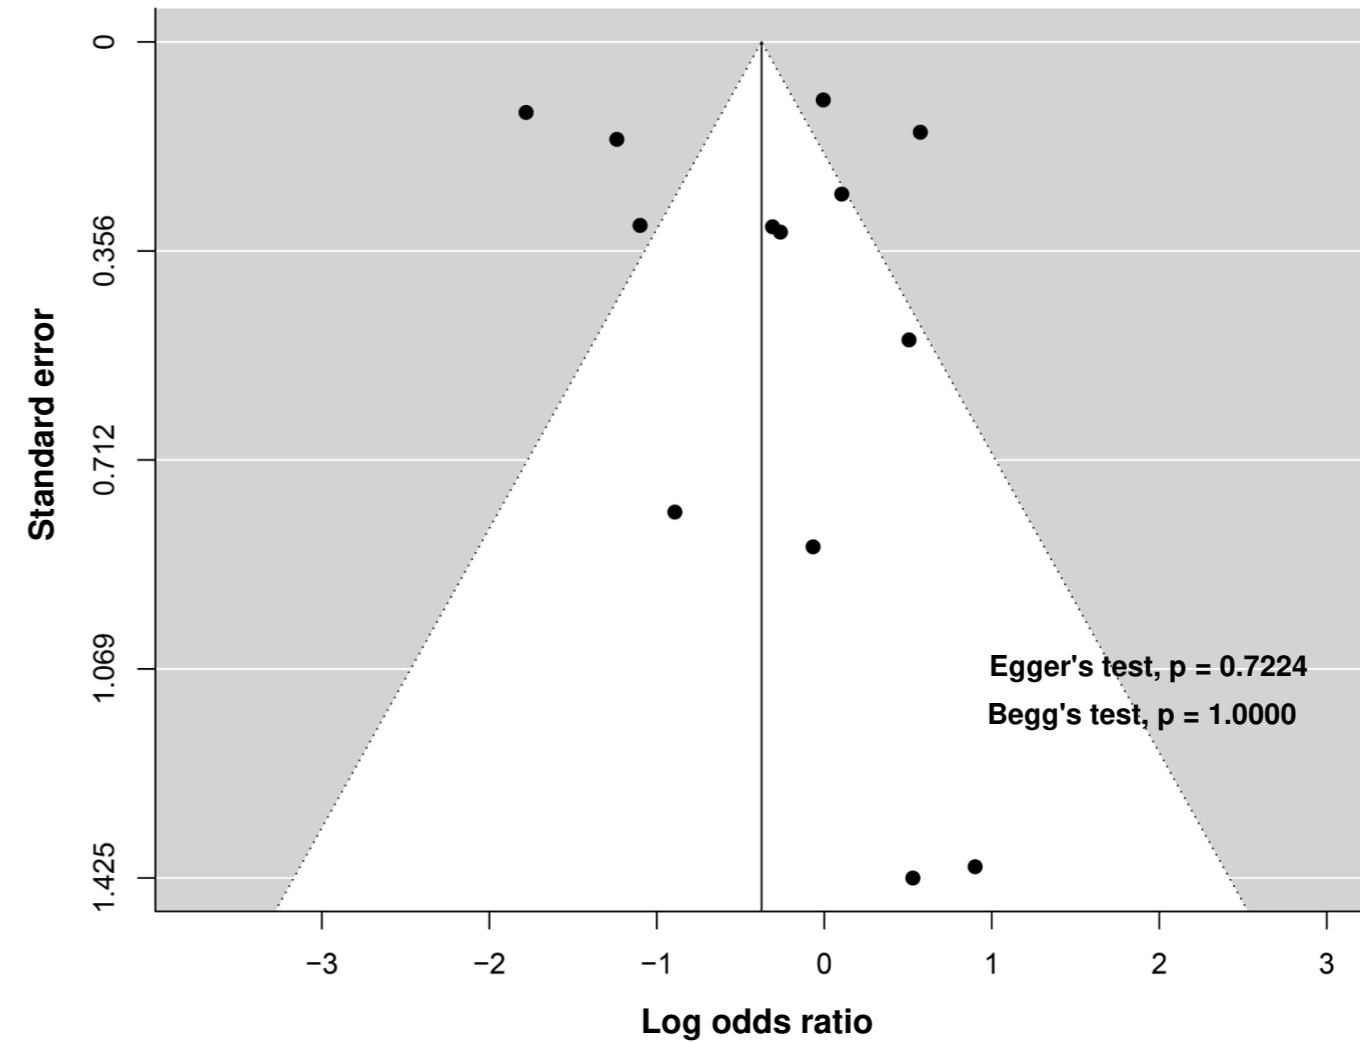

Supplement: thoraxjnl-2020-215322supp016_data_supplement.pdf [file thoraxjnl-2020-215322supp016_data_supplement.pdf]
