# Supplementary figures and images for: Renin-angiotensin system blocker and outcomes of COVID-19: a systematic review and meta-analysis
Source: HighWire-hosted journal article supplement (doi:10.1136/thoraxjnl-2020-215322), 2021-01-27

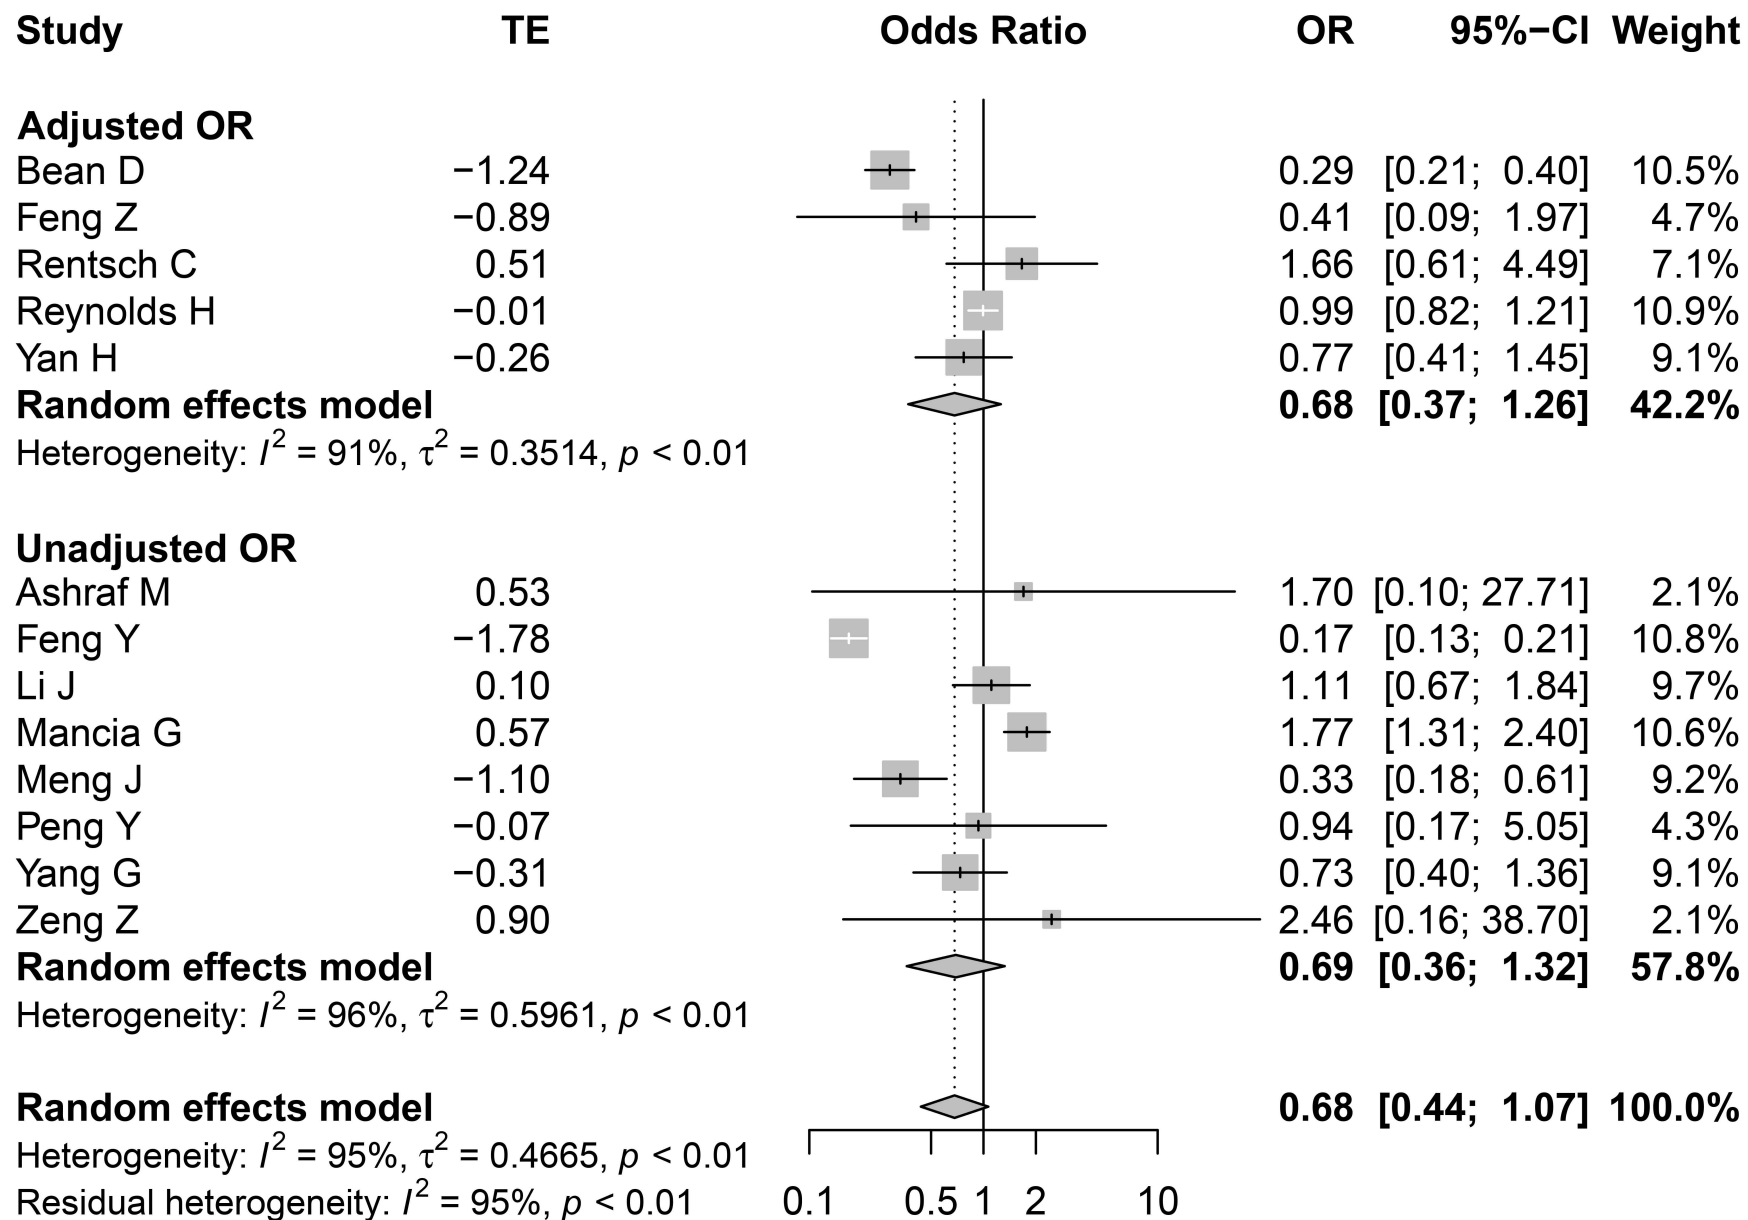

Supplement: thoraxjnl-2020-215322supp011_data_supplement.pdf [file thoraxjnl-2020-215322supp011_data_supplement.pdf]

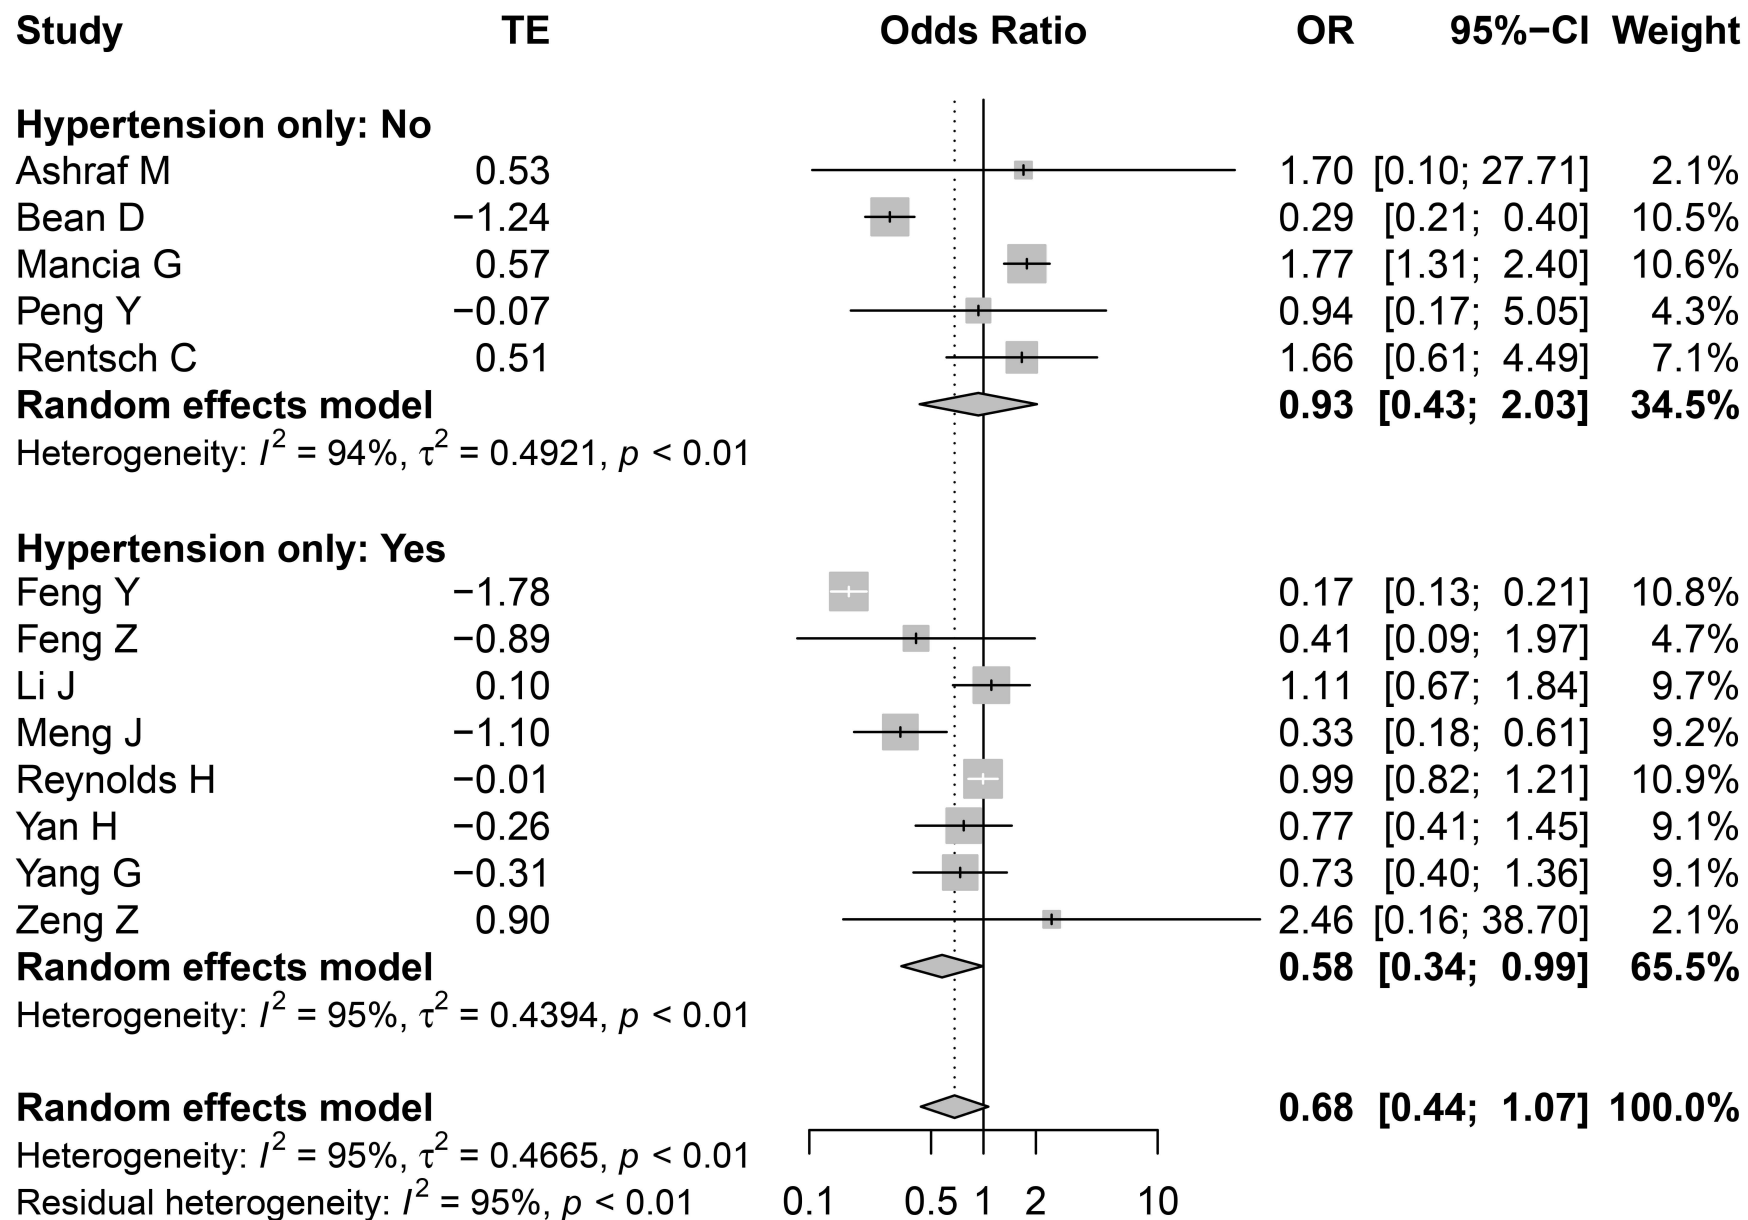

Supplement: thoraxjnl-2020-215322supp012_data_supplement.pdf [file thoraxjnl-2020-215322supp012_data_supplement.pdf]

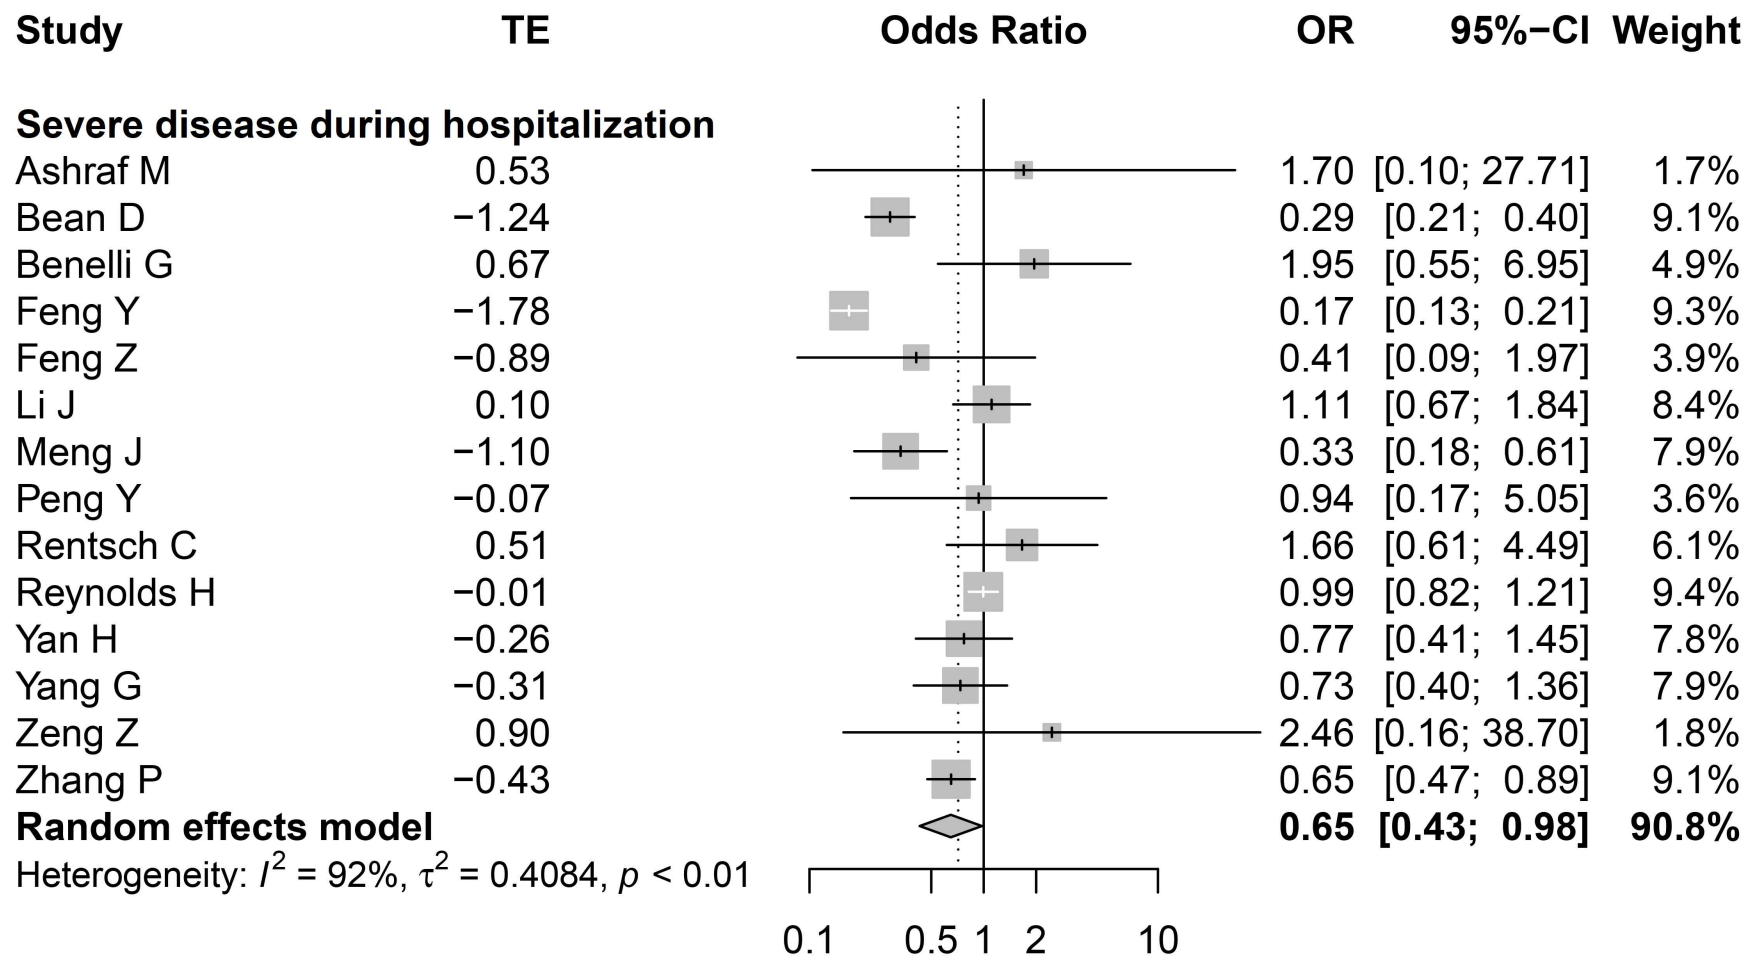

Supplement: thoraxjnl-2020-215322supp015_data_supplement.pdf [file thoraxjnl-2020-215322supp015_data_supplement.pdf]

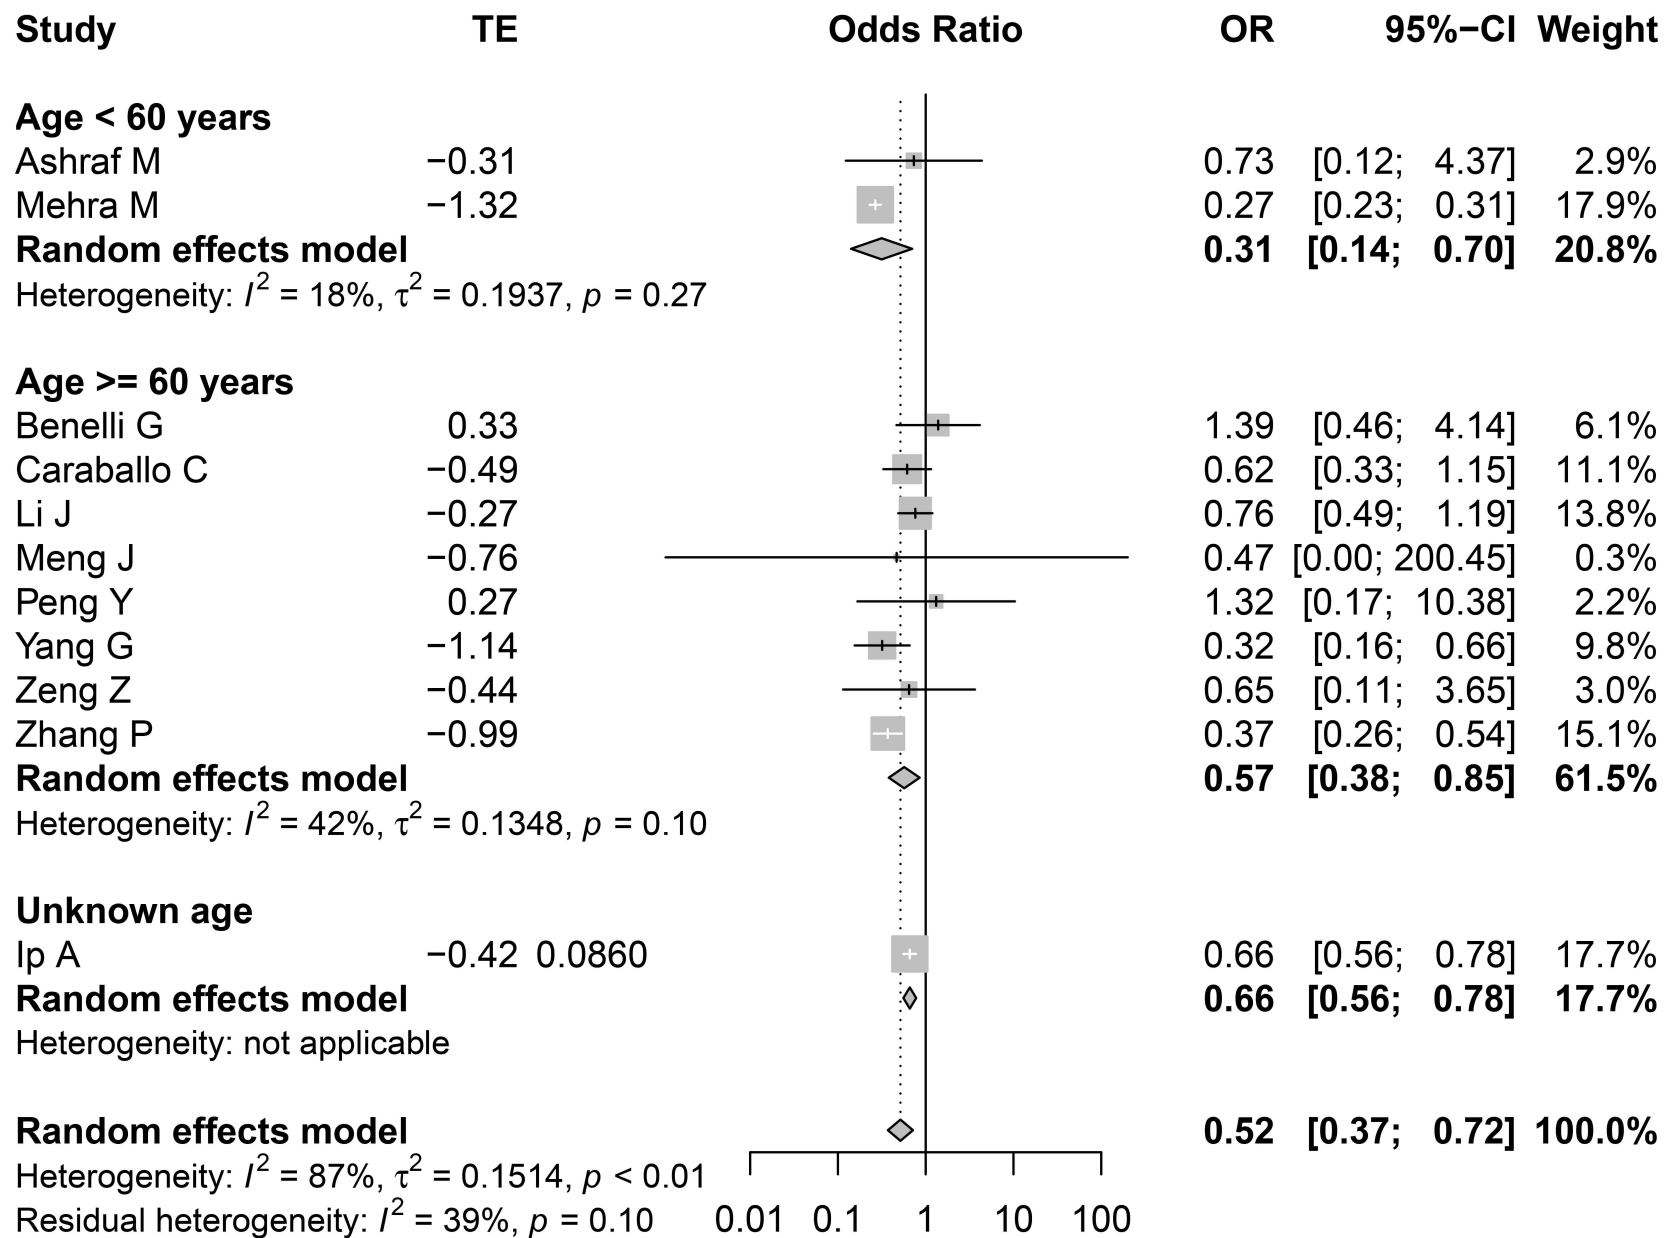

Supplement: thoraxjnl-2020-215322supp008_data_supplement.pdf [file thoraxjnl-2020-215322supp008_data_supplement.pdf]

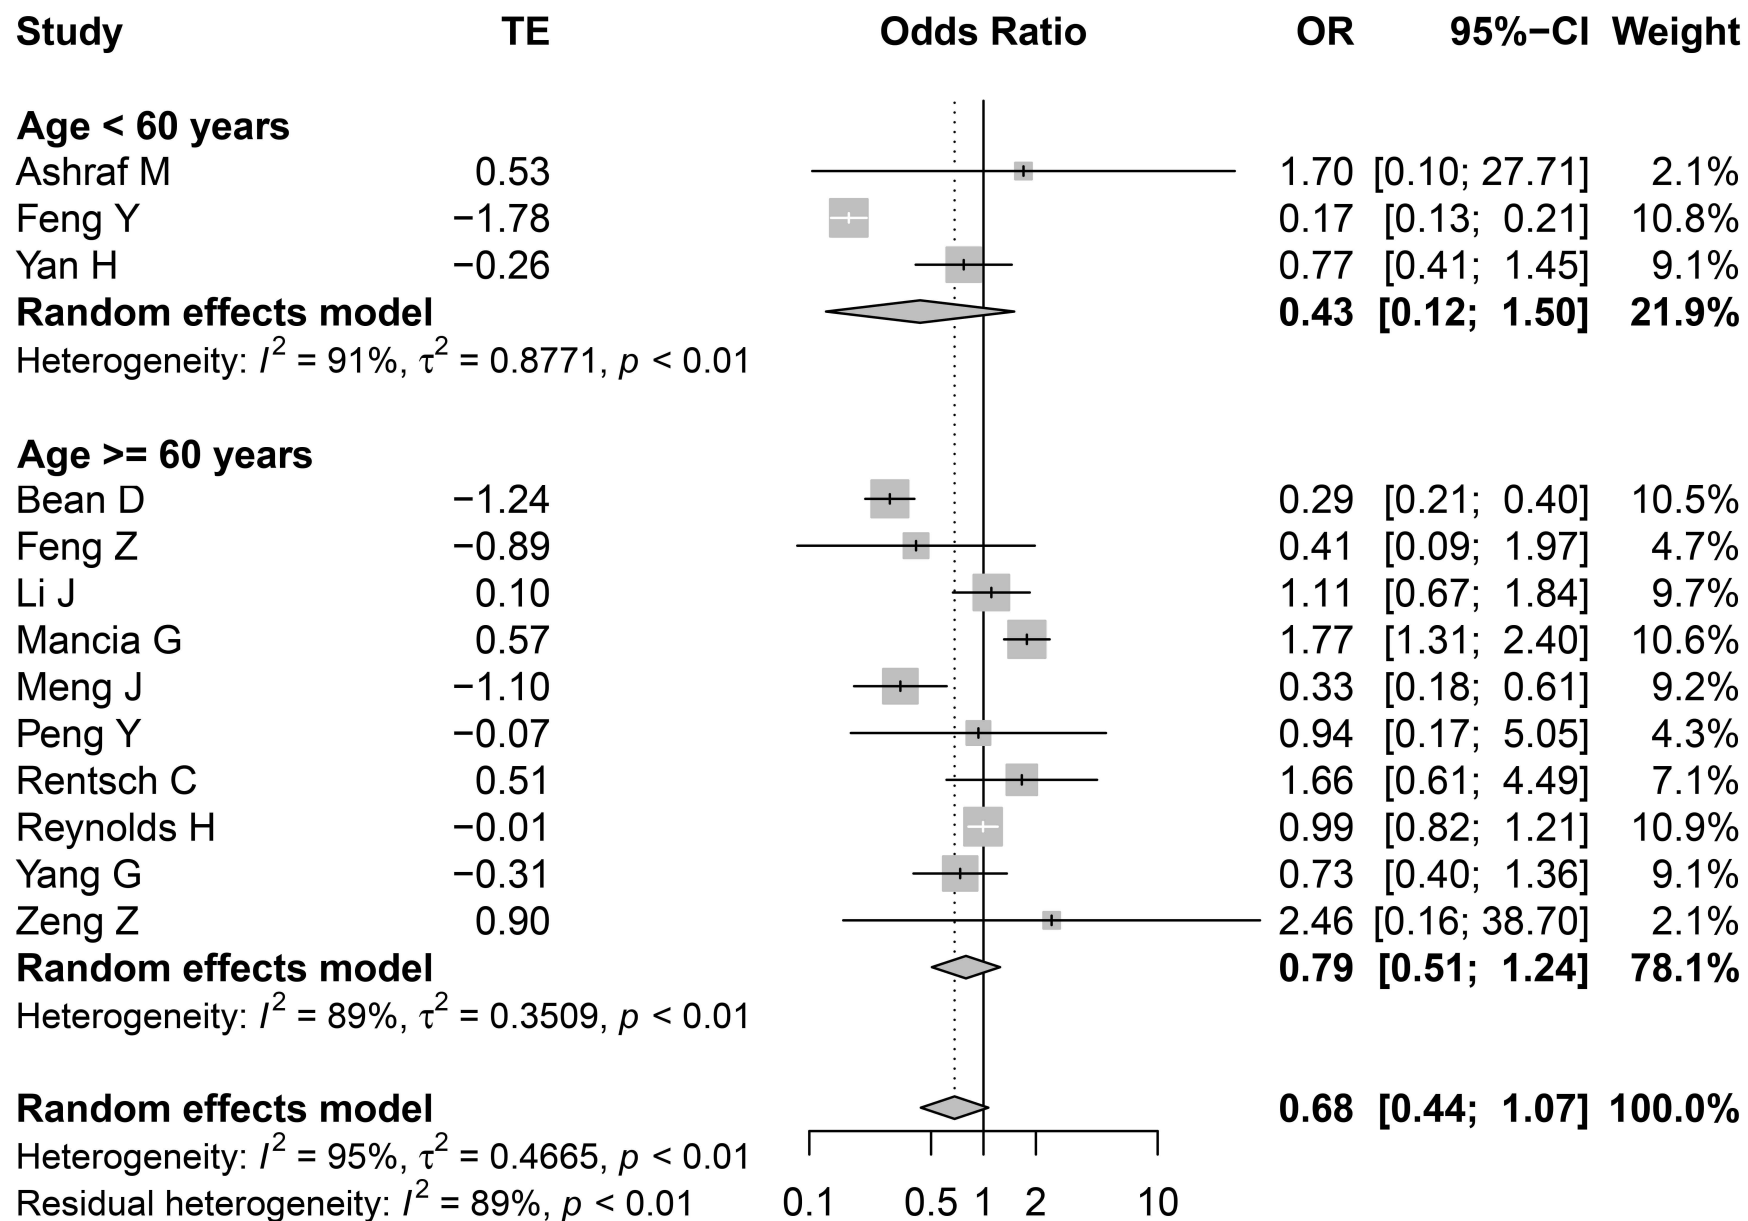

Supplement: thoraxjnl-2020-215322supp013_data_supplement.pdf [file thoraxjnl-2020-215322supp013_data_supplement.pdf]

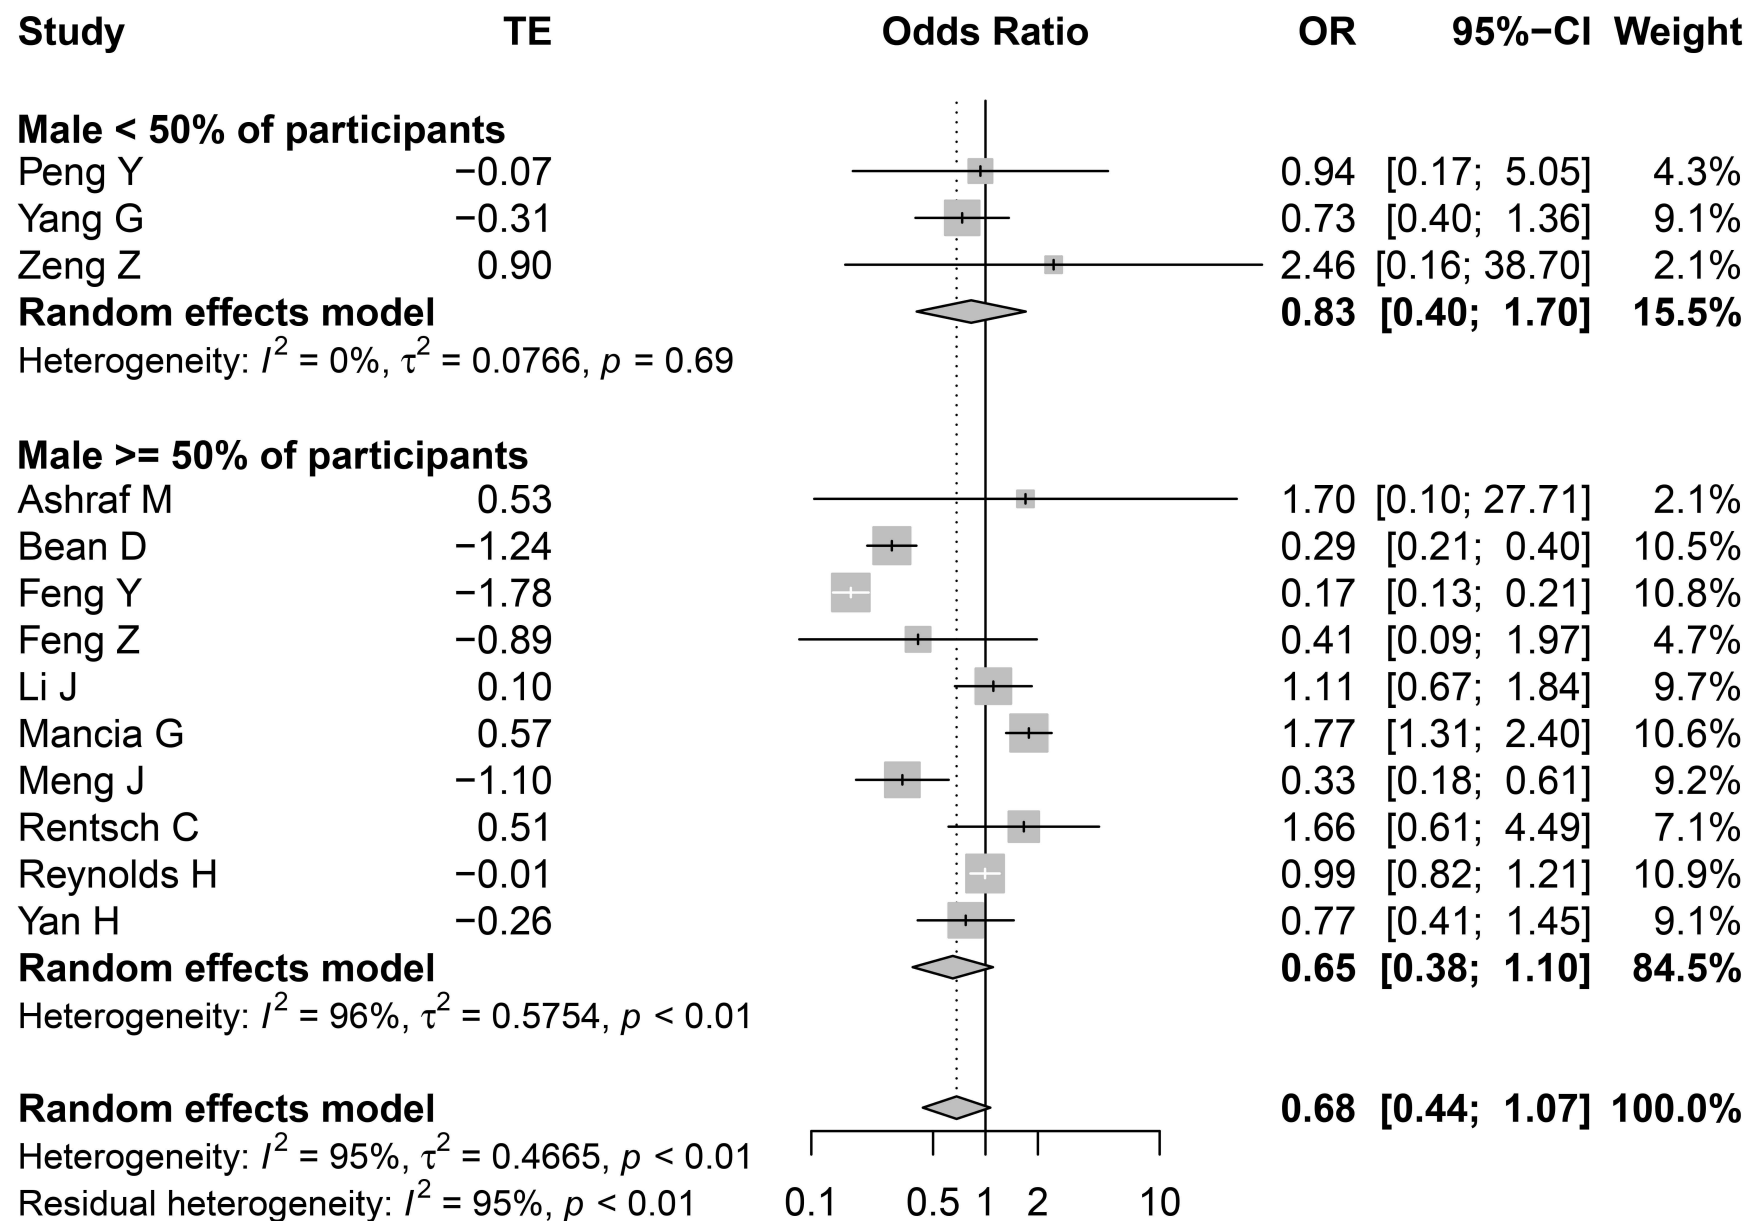

Supplement: thoraxjnl-2020-215322supp014_data_supplement.pdf [file thoraxjnl-2020-215322supp014_data_supplement.pdf]

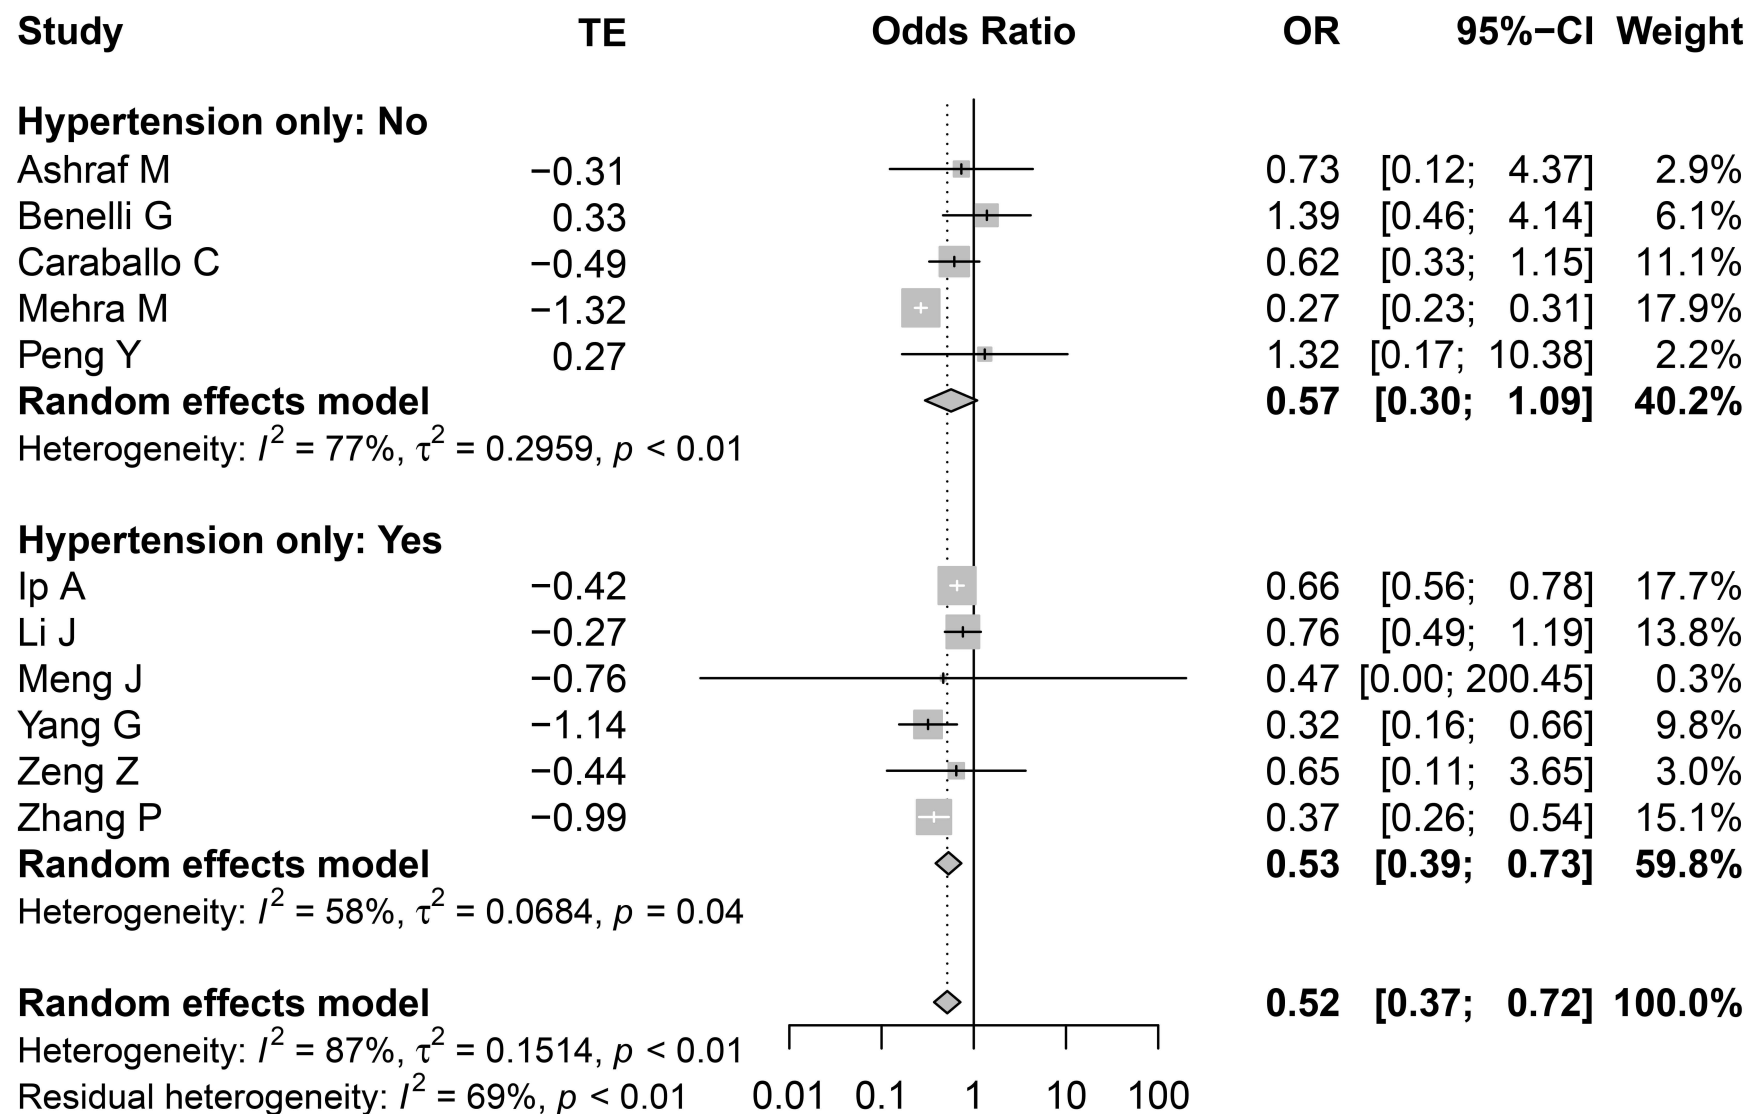

Supplement: thoraxjnl-2020-215322supp007_data_supplement.pdf [file thoraxjnl-2020-215322supp007_data_supplement.pdf]

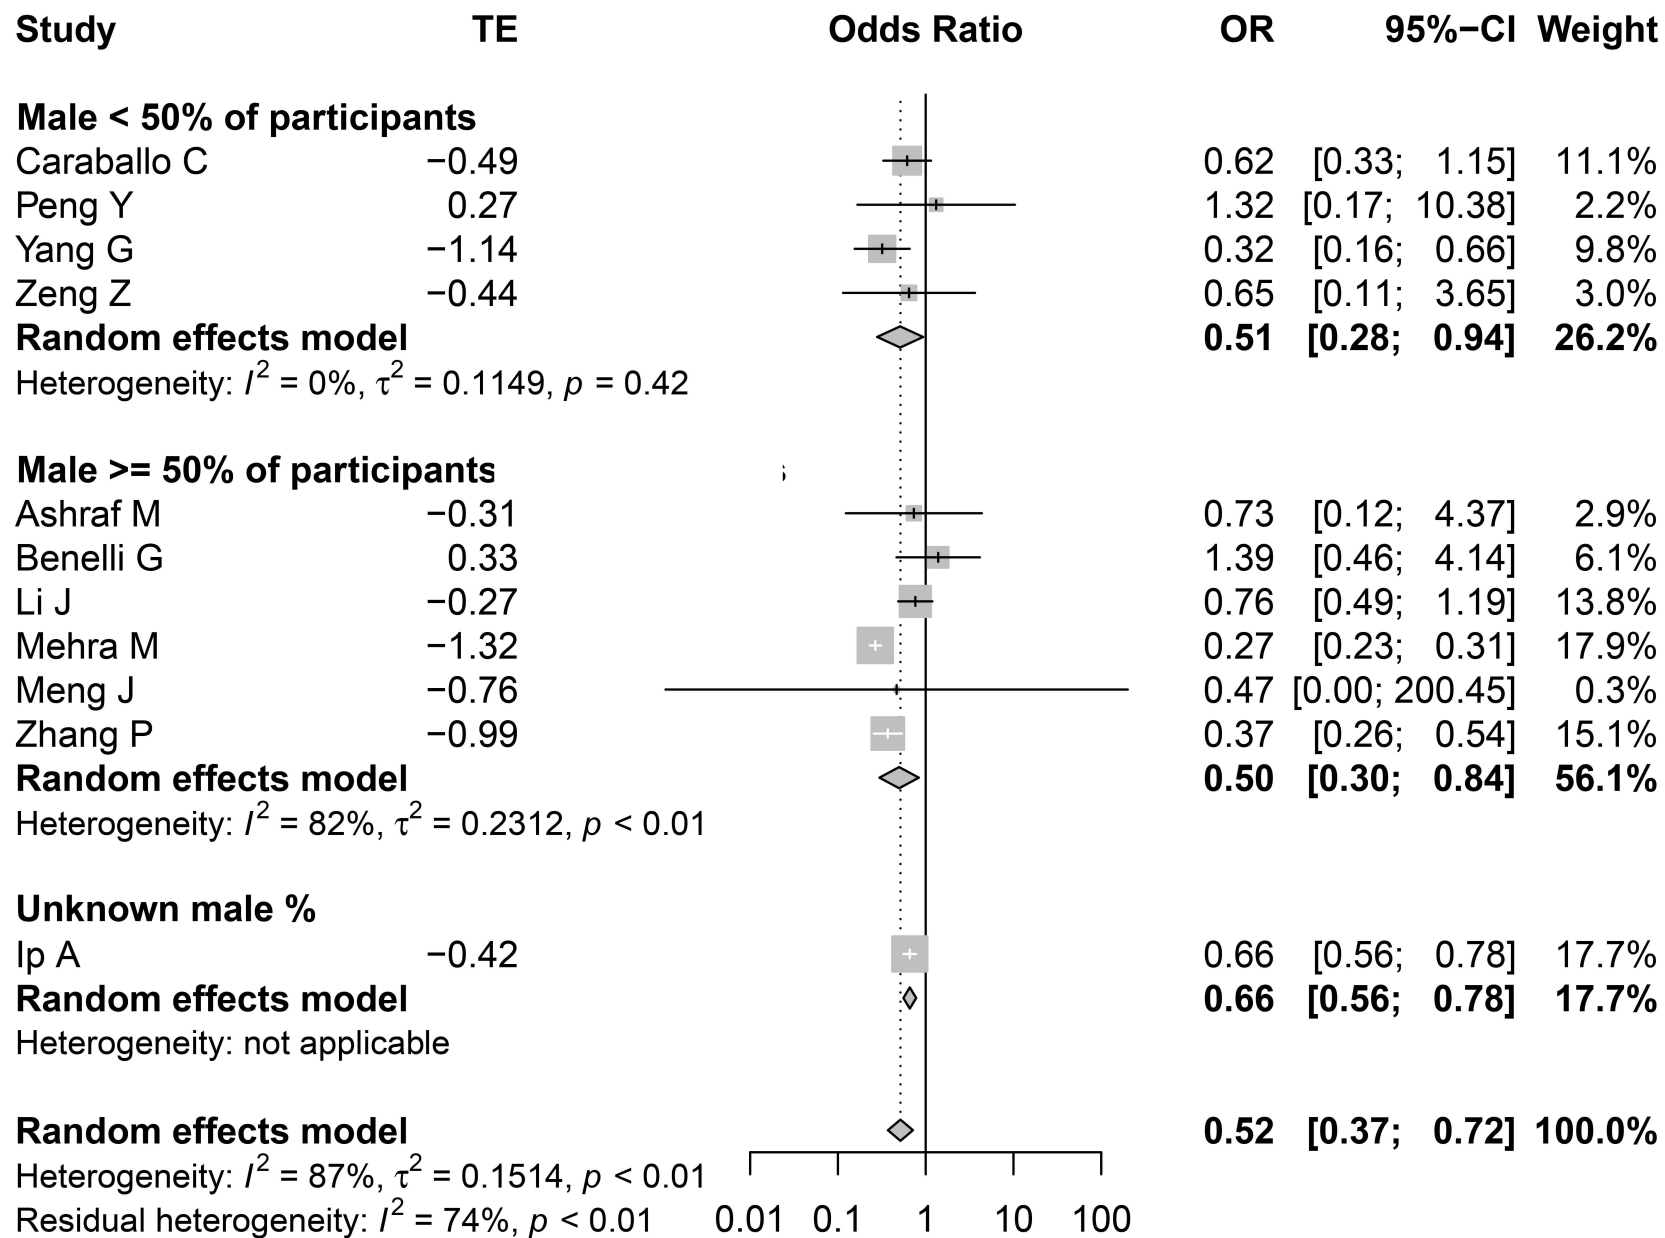

Supplement: thoraxjnl-2020-215322supp009_data_supplement.pdf [file thoraxjnl-2020-215322supp009_data_supplement.pdf]

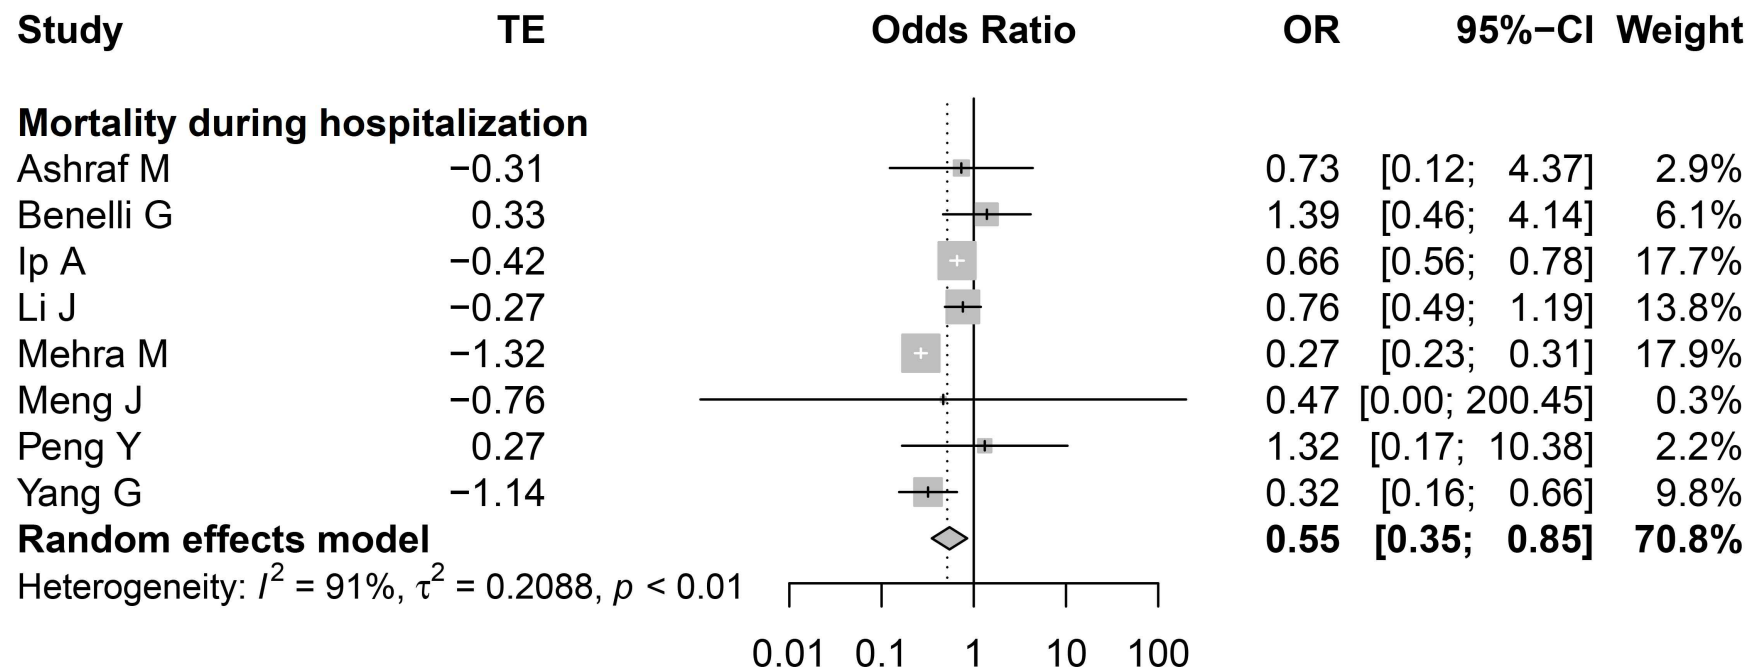

Supplement: thoraxjnl-2020-215322supp010_data_supplement.pdf [file thoraxjnl-2020-215322supp010_data_supplement.pdf]
